# Supplementary material for: In Silico Targeting of Fascin Protein for Cancer Therapy: Benchmarking, Virtual Screening and Molecular Dynamics Approaches
Source: MDPI journal article supplement (doi:10.3390/molecules28031296), 2023-01-29
Supplement: s1 [file s1]

# Supplementary Material

## For

### *In silico* Targeting of Fascin protein for Cancer Therapy: Benchmarking, Virtual Screening and Molecular Dynamics Approaches

Heba H. A. Hassan<sup>1</sup>, Muhammad I. Ismail<sup>2</sup>, Mohammed A.S. Abourehab<sup>3</sup>, Frank M. Boeckler<sup>4</sup>,  
Tamer M. Ibrahim<sup>5\*</sup>, Reem K. Arafa<sup>1, 6\*</sup>

<sup>1</sup> Drug Design and Discovery Laboratory, Zewail City of Science and Technology, October Gardens, 6th of October City, 12578 Giza, Egypt

<sup>2</sup> Department of Pharmaceutical Chemistry, Faculty of Pharmacy, The British University in Egypt, Al-Sherouk City, Cairo-Suez Desert Road, 11837 Cairo, Egypt

<sup>3</sup> Department of Pharmaceutics, College of Pharmacy, Umm Al-Qura University, Makkah 21955, Saudi Arabia

<sup>4</sup> Lab for Molecular Design and Pharmaceutical Biophysics, Department of Pharmacy and Biochemistry, Institute of Pharmaceutical Sciences, University of Tübingen, Auf der Morgenstelle 8, 72076 Tübingen, Germany

<sup>5</sup> Department of Pharmaceutical Chemistry, Faculty of Pharmacy, Kafrelsheikh University, Kafrelsheikh 33516, Egypt

<sup>6</sup> Biomedical Sciences Program, University of Science and Technology, Zewail City of Science and Technology, October Gardens, 6th of October City, Giza 12578, Egypt

\* Correspondence: Reem Arafa: rkhidr@zewailcity.edu.eg

Tamer M. Ibrahim: Tamer\_Mohamad@pharm.kfs.edu.eg, tamer.ibrahim2@gmail.com

#### \* Correspondence:

Reem Arafa: rkhidr@zewailcity.edu.eg

Tamer M. Ibrahim: tamer\_mohamad@pharm.kfs.edu.eg, tamer.ibrahim2@gmail.com

---

**Keywords:** Cancer; Fascin; docking; virtual screening (VS); benchmarking; DEKOIS 2.0

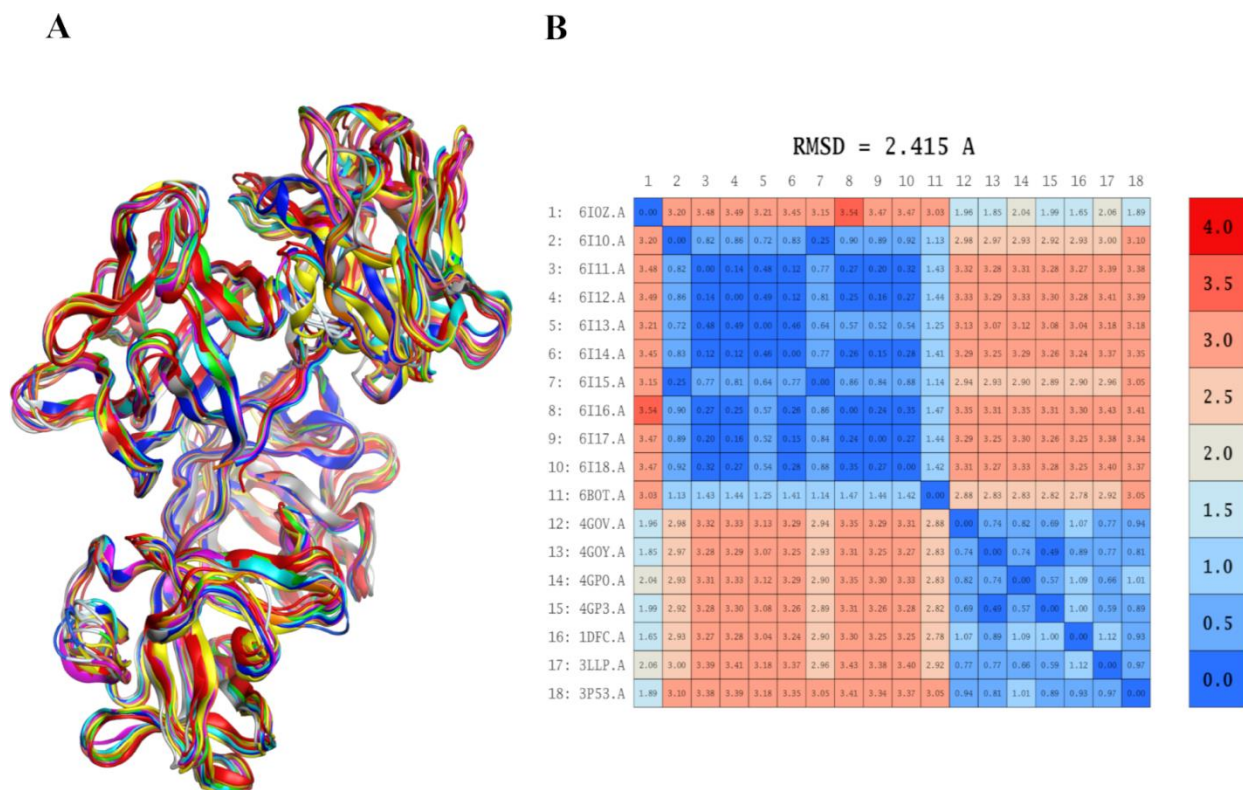

**Figure S1.** (A) Superposition of the 18 X-ray structures of Fascin1 including 11 co-crystallized with ligands, 4 mutant structures and 3 apo structures. (B) Pairwise RMSD matrix for all Fascin structures calculated for their  $\alpha$  carbon atoms. The color code is assigned randomly.

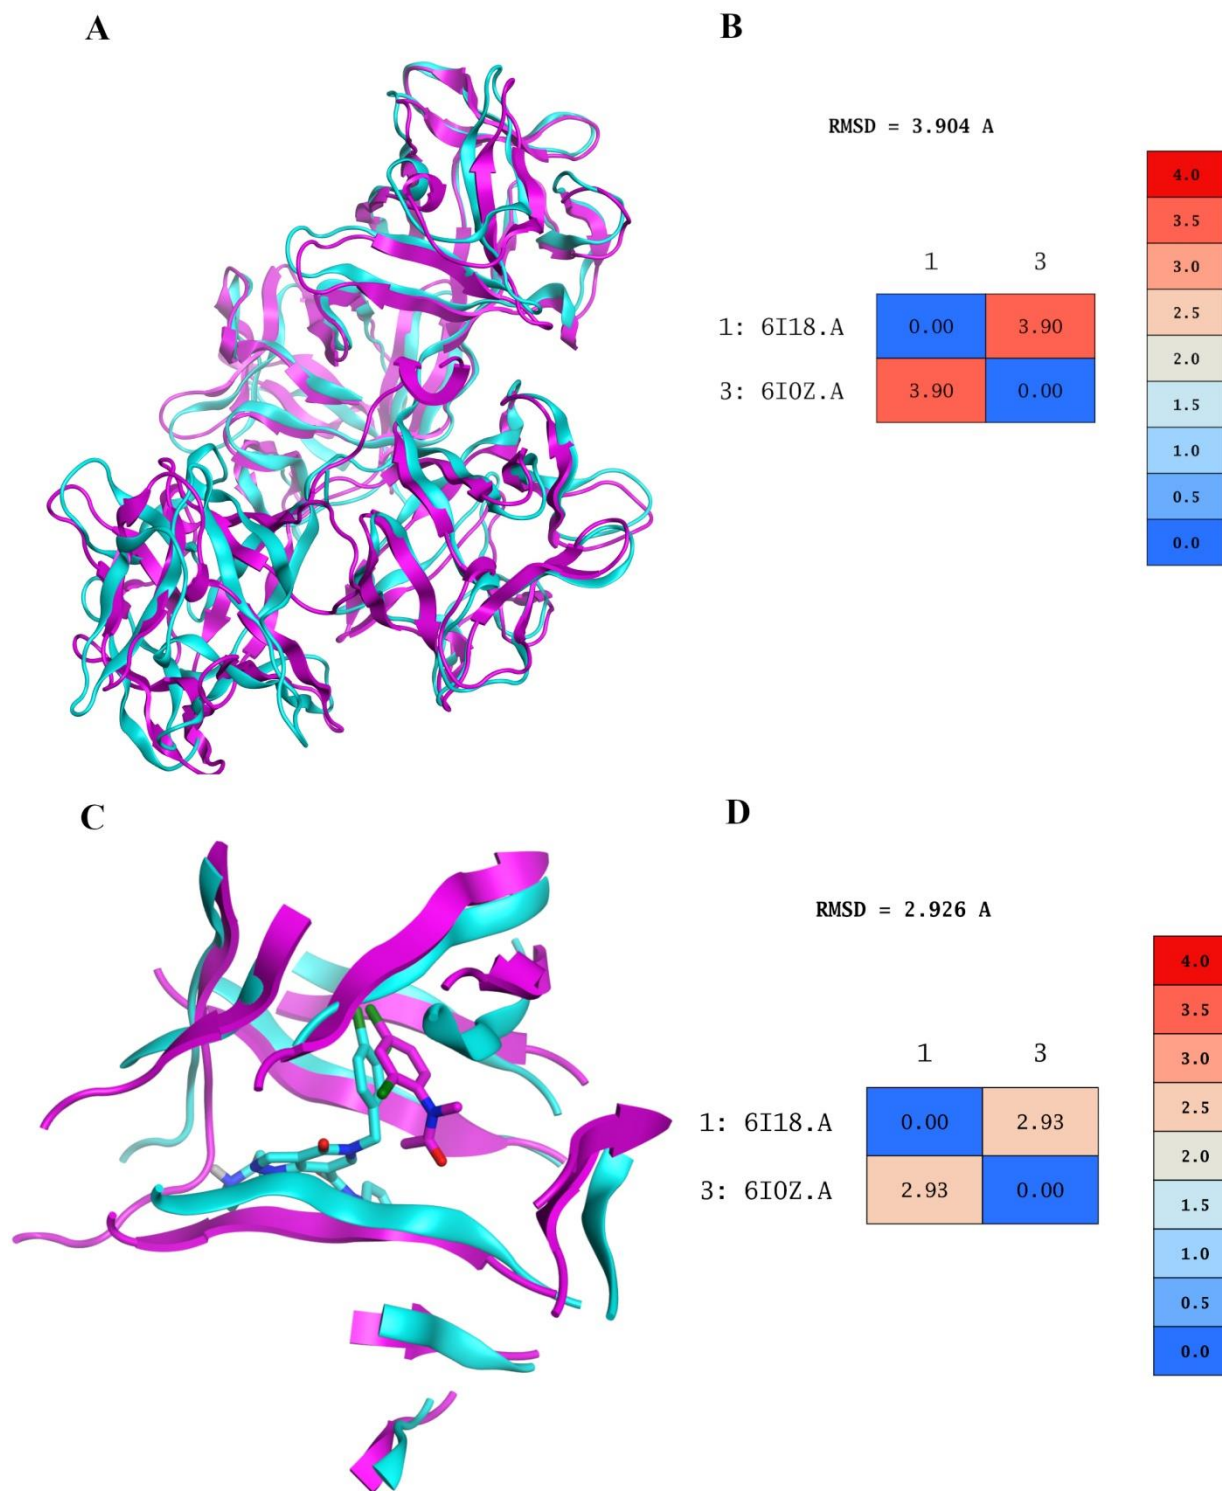

**Figure S2.** (A) Superposition of the Fascin structures PDB ID: (6I0Z and 6I18). (B) Pairwise RMSD matrix of the backbone of the two proteins. 6I0Z and 6I18 are represented in purple and cyan colors, respectively. (C) Superposition of the Fascin structures' pockets PDB ID: (6I0Z and 6I18) showing their pairwise RMSD value, (D).

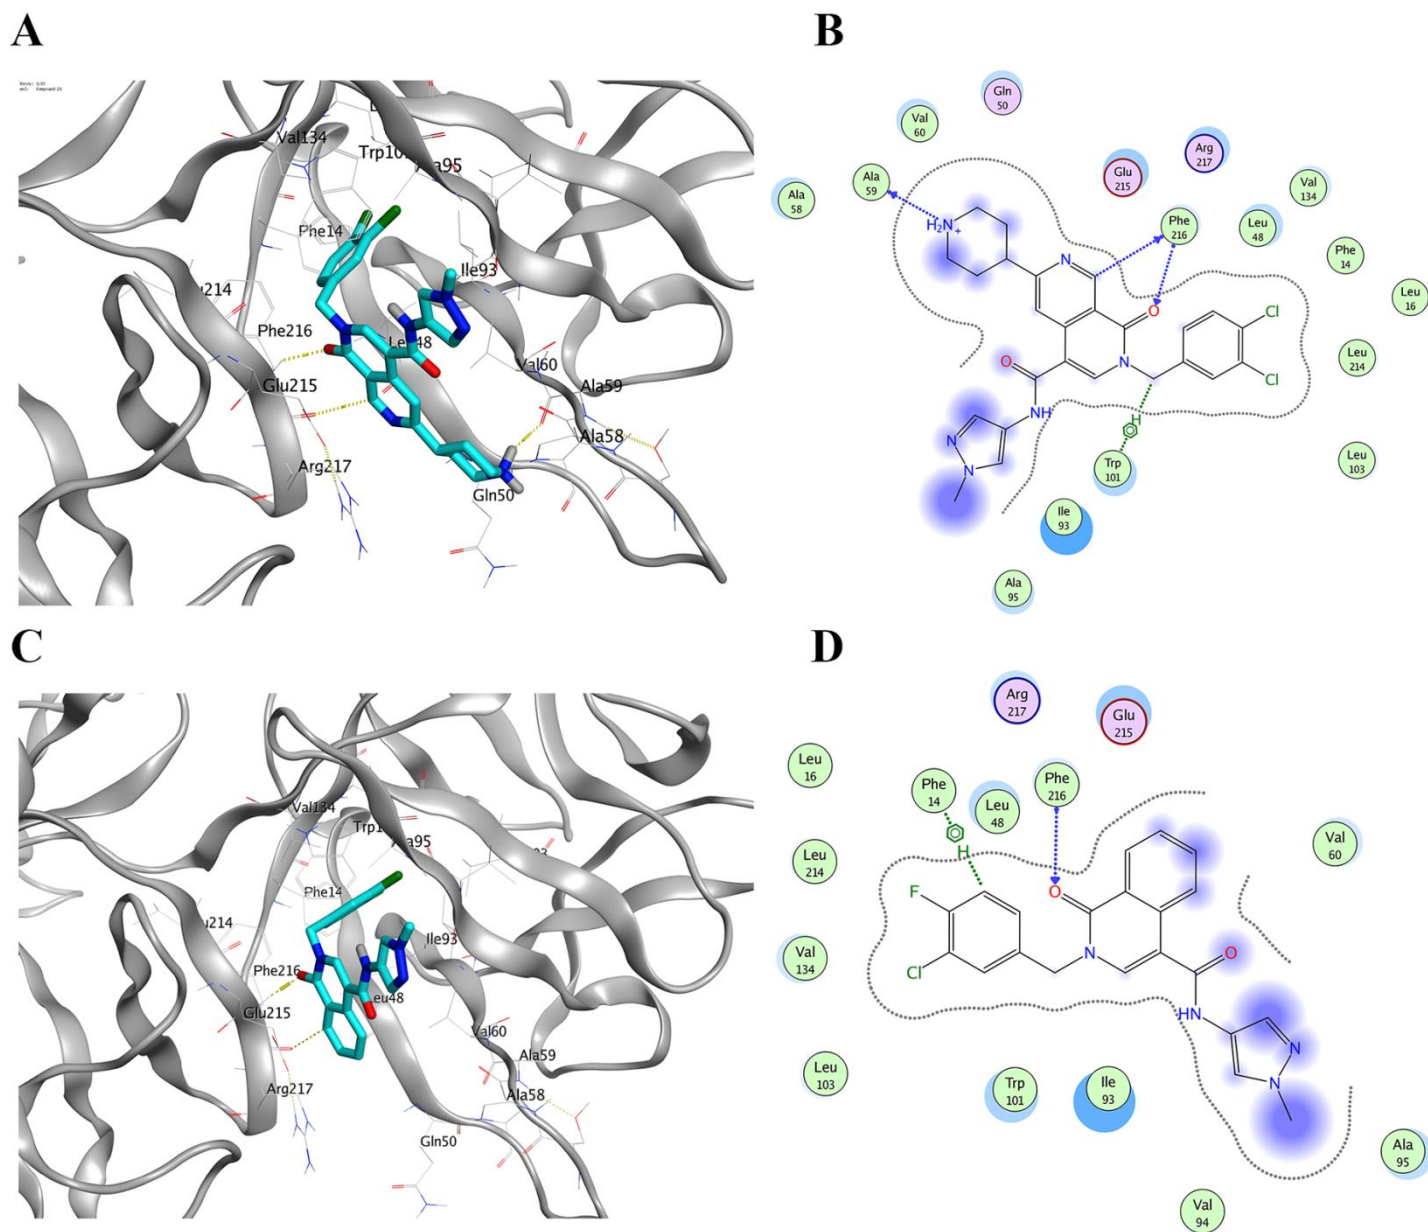

**Figure S3.** Docking poses of the best two ranked compounds (rank 1 and 2) from the bioactives in the binding site of Fascin (PDB:6I18), for (A, B) and (C, D), respectively. Yellow dashed lines show favorable interactions. Non-polar hydrogen atoms were ignored for clarification.

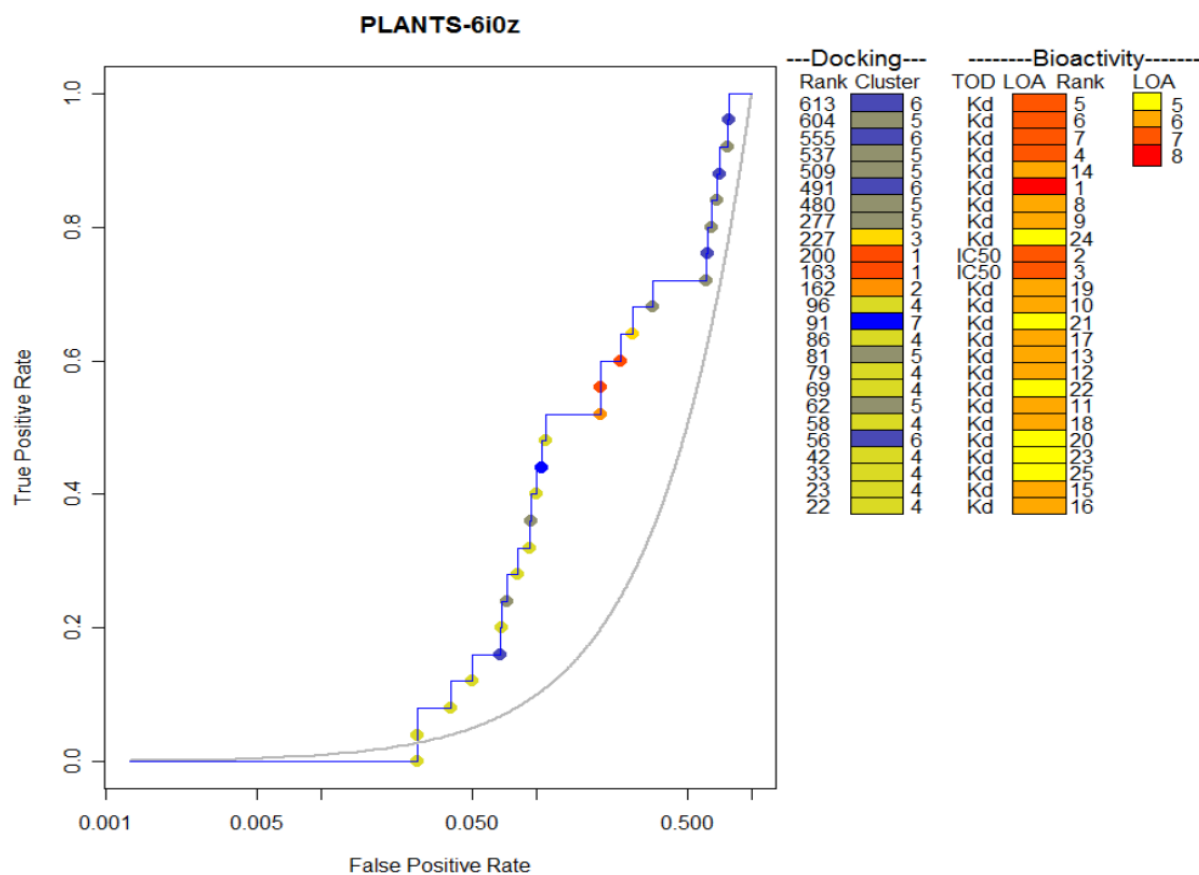

**Figure S4:** pROC-Chemotype plot of the Fascin PDB ID: 6I0Z using the PLANTS docking tool. The color scheme of the clusters and bioactivity rank is the same of figure 3A.



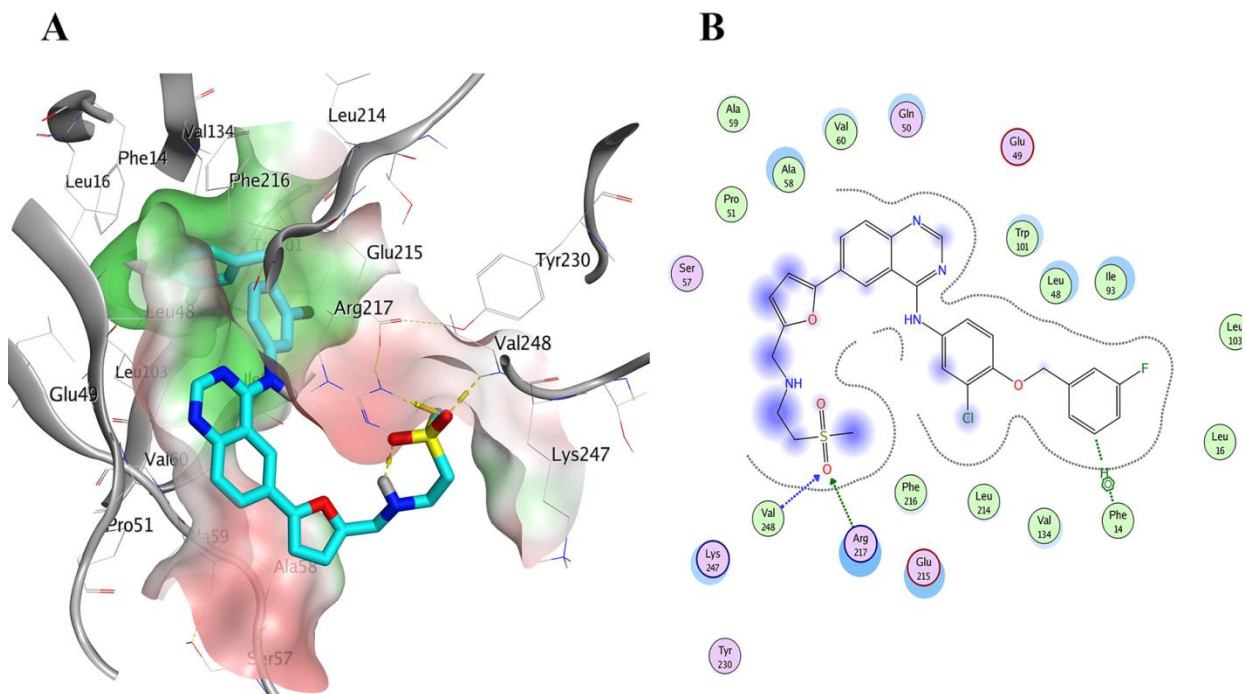

**Figure S5.** Docking pose of Lapatinib (DrugBank- cyan sticks) in the Fascin binding site 2 (PDB ID: 6I18), represented by 3D and 2D as (A) and (B), respectively. Non-polar hydrogen atoms were ignored for clarification. The color scheme is the same as in Figure 4.

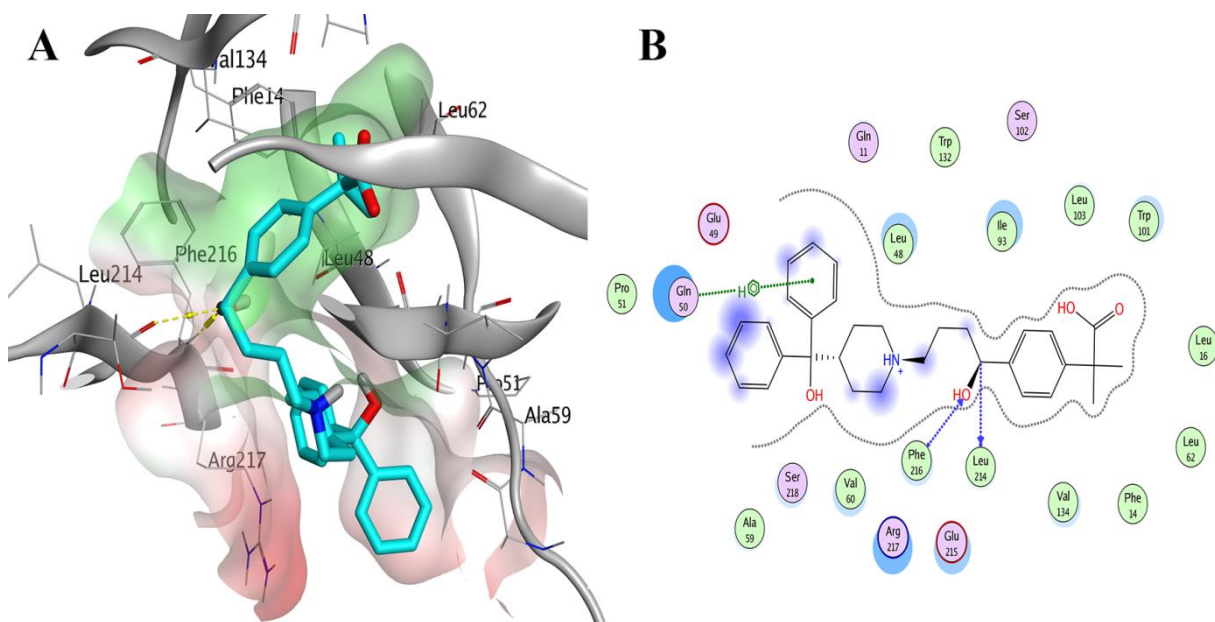

**Figure S6.** Docking pose of Fexofenadine (DrugBank- cyan sticks) in the Fascin binding site 2 (PDB ID: 6I18), represented by 3D and 2D as (A) and (B), respectively. Non-polar hydrogen atoms were ignored for clarification. The color scheme is the same as in Figure 4.

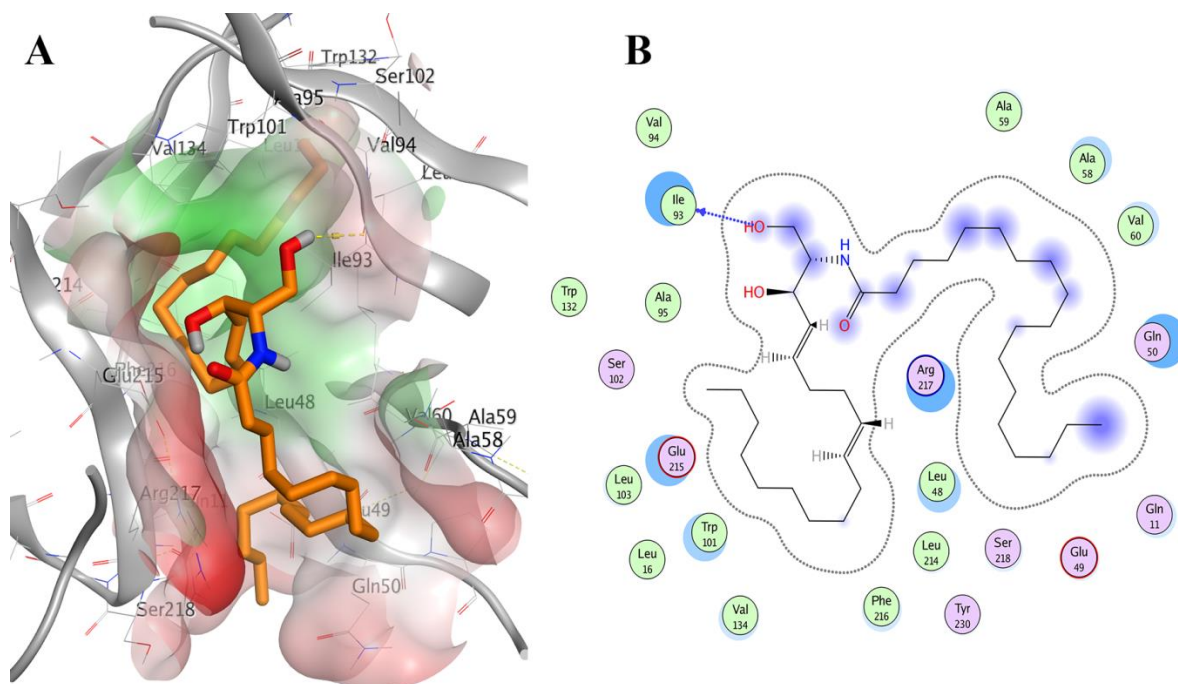

**Figure S7.** Docking pose of compound CP3451 (NANPDB1 - orange sticks) in the Fascin binding site 2 (PDB ID: 6I18), represented by 3D and 2D as (A) and (B), respectively. Non-polar hydrogen atoms were ignored for clarification. The color scheme is the same as in Figure 4.

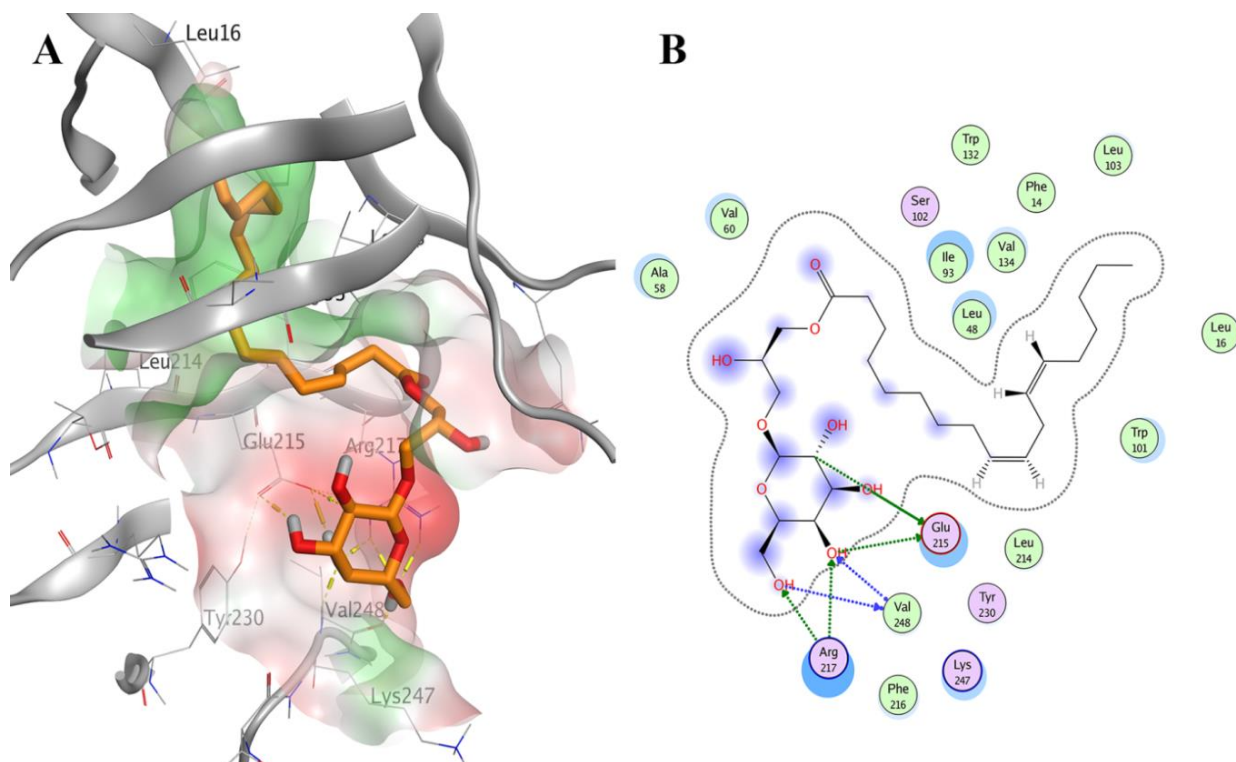

**Figure S8.** Docking pose of compound CP3270 (NANPDB2 - orange sticks) in the Fascin binding site 2 (PDB ID: 6I18), represented by 3D and 2D as (A) and (B), respectively. The color scheme is the same as in Figure 4

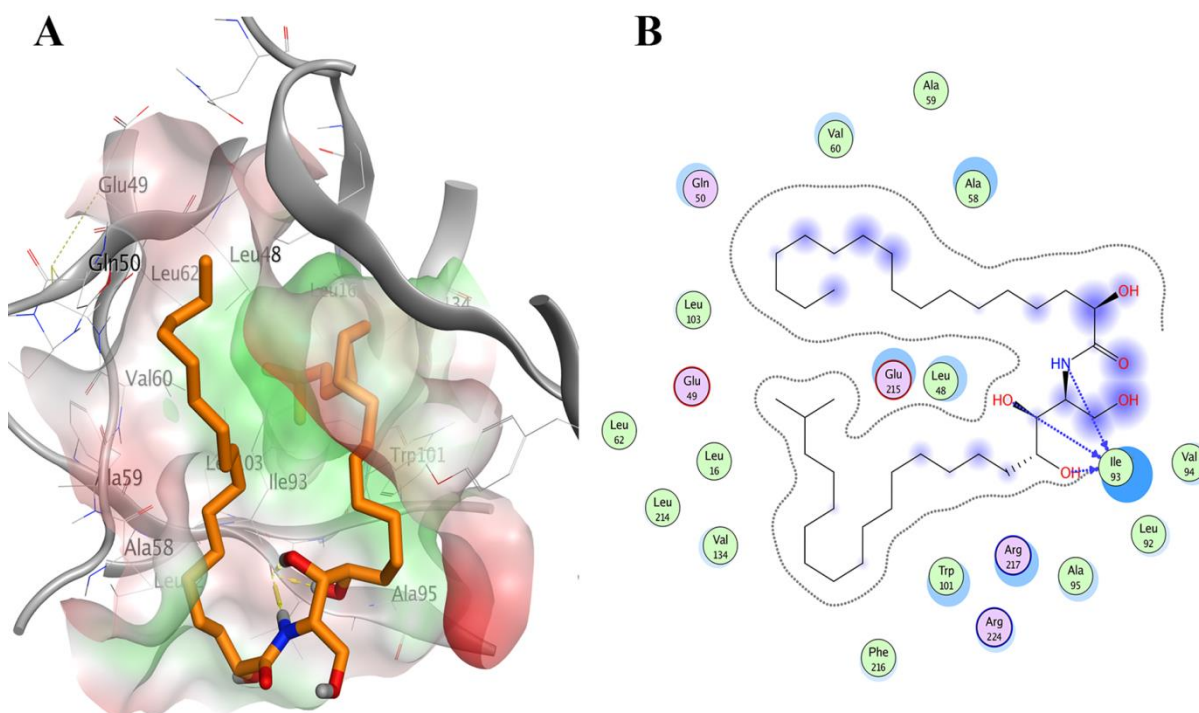

**Figure S9.** Docking pose of compound CP3756 (orange sticks) in the Fascin binding site 2 (PDB ID: 6I18), represented by 3D and 2D as (A) and (B), respectively. The color scheme is the same as in Figure 4.

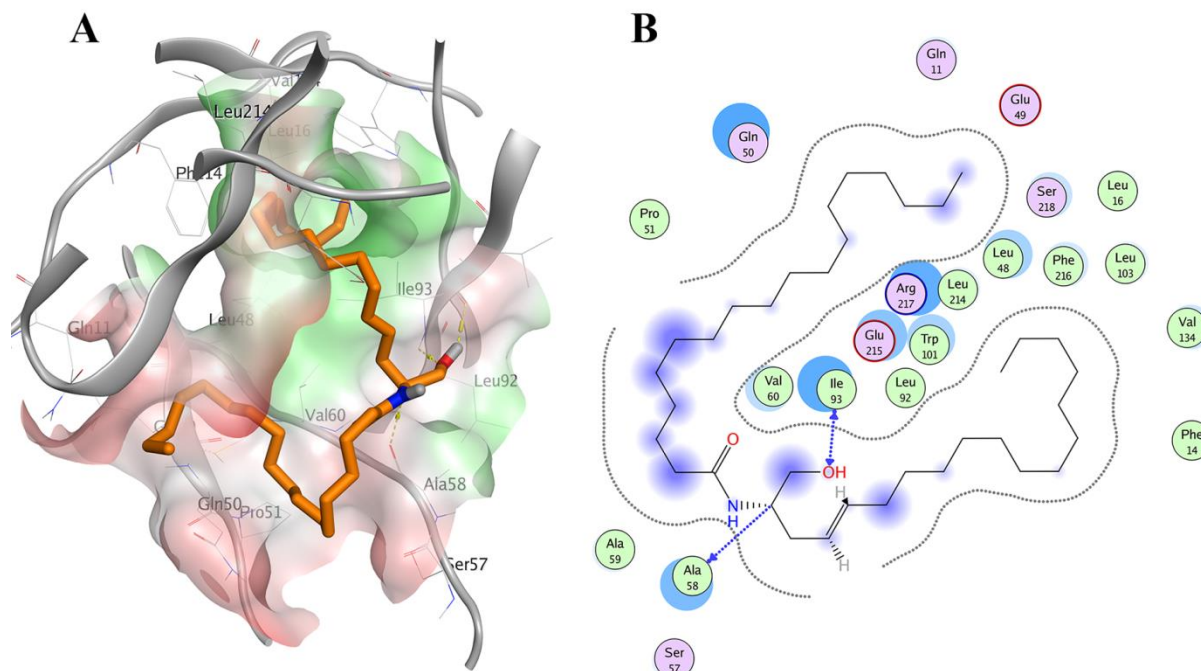

**Figure S10.** Docking pose of compound CP3407 (orange sticks) in the binding site 2 of Fascin (PDB ID: 6I18), represented by 3D and 2D as (A) and (B), respectively. The color scheme is same as Figure 4.





**Table S1: Fascin structures in the protein data bank (PDB)**

| <b>PDB ID</b> | <b>Structure title</b>                                                            | <b>Ligand ID</b> | <b>Binding site</b> | <b>Resolution (Å)</b> | <b>Reference</b> |
|---------------|-----------------------------------------------------------------------------------|------------------|---------------------|-----------------------|------------------|
| 1DFC          | Crystal structure of human Fascin, an actin-crosslinking protein.                 | -                | -                   | 2.9                   | [80]             |
| 3LLP          | 1.8 Å human Fascin 1 crystal structure                                            | -                | -                   | 1.8                   | [21]             |
| 3P53          | Structure of Fascin                                                               | -                | -                   | 2                     | [81]             |
| 4GOV          | The crystal structure of human Fascin 1 S39D mutant                               | -                | -                   | 2.2                   | [18]             |
| 4GOY          | The crystal structure of human Fascin 1 K41A mutant                               | -                | -                   | 2.3                   |                  |
| 4GP0          | The crystal structure of human Fascin 1 R149A K150A R151A mutant                  | -                | -                   | 2.5                   |                  |
| 4GP3          | The crystal structure of human Fascin 1 K358A mutant                              | -                | -                   | 2.25                  |                  |
| 6I0Z          | Crystal structure of Fascin in complex with compound 1                            | GZQ              | 2                   | 1.77                  | [27]             |
| 6I10          | Crystal structure of Fascin in complex with compound 2                            | GZK              | 2                   | 2.1                   |                  |
| 6I11          | Crystal structure of Fascin in complex with compound 3                            | H0H              | 2                   | 1.67                  |                  |
| 6I12          | Crystal structure of Fascin in complex with compound 5                            | H08              | 2                   | 1.65                  |                  |
| 6I13          | Crystal structure of Fascin in complex with compound 7                            | H0Q              | 2                   | 1.79                  |                  |
| 6I14          | Crystal structure of Fascin in complex with compound 9                            | GZN              | 2                   | 1.73                  |                  |
| 6I15          | Crystal structure of Fascin in complex with compound 11                           | GZT              | 2                   | 1.91                  |                  |
| 6I16          | Crystal structure of Fascin in complex with compound 15                           | H0B              | 2                   | 2                     |                  |
| 6I17          | Crystal structure of Fascin in complex with compound 24                           | GZW              | 2                   | 1.56                  |                  |
| 6I18          | Crystal structure of Fascin in complex with BDP-13176                             | H0N              | 2                   | 1.49                  |                  |
| 6B0T          | Structural Insights into the Induced-fit Inhibition of Fascin by a Small Molecule | C7V              | 2                   | 2.8                   | [24]             |

**Table S2: The best enriched 1% of the VS results for NANPDB molecules against Fascin (PDB ID: 6I18).**

| Docking rank | Structure                                                                           | Docking score | Name / NANPDB ID                                                      | M.wt.  |
|--------------|-------------------------------------------------------------------------------------|---------------|-----------------------------------------------------------------------|--------|
| 1            | 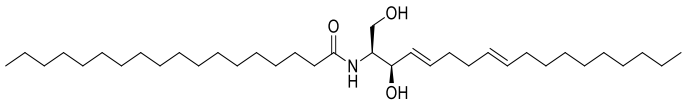   | -127.31       | 2S,3R-4E,8E-2-(octadecanoylamino)-octadeca-4,8-diene-1,3-diol /CP3451 | 563.94 |
| 2            |    | -126.91       | 1-O-linoleoyl-3-O-beta-D-galactopyranosyl-syn-glycerol /CP3270        | 516.66 |
| 3            |    | -124.59       | Echinoclathriamide /CP3756                                            | 628.02 |
| 4            |    | -124.38       | 2S,3R-4E-2-(octadecanoylamino)-octadec-4-ene-1-ol /CP3407             | 549.95 |
| 5            |   | -124.32       | Negombata ceramide 1b /CP3831                                         | 654.1  |
| 6            |  | -124.29       | 2S,3R-4E,8E-2-(hexadecanoylamino)-docosa-4,8-diene-1,3-diol /CP3560   | 591.99 |
| 7            |  | -123.17       | Tanacetolide A /CP3852                                                | 664.09 |
| 8            |  | -122.99       | Sphinga-4,8 dienine ester /CP3406                                     | 549.91 |
| 9            |  | -120.78       | Quercetin-3-O-beta-(6''-galloyl)galactoside) /CP3685                  | 614.46 |
| 10           |  | -120.67       | Rutarensin /CP3840                                                    | 657.55 |

|    |  |         |                                                                                                              |        |
|----|--|---------|--------------------------------------------------------------------------------------------------------------|--------|
| 11 |  | -119.88 | 1-O-3,4-dimethoxy-phenylethyl-4-O-3,4-dimethoxy cinnamoyl-6-O-cinnamoyl-beta-D-glucopyranose /CP3854         | 664.69 |
| 12 |  | -118.82 | Phytol-3,7,11,15-tetramethyl-2-hexadecanenoate /CP3554                                                       | 589.03 |
| 13 |  | -118.75 | Aikupikanyne F /CP1922                                                                                       | 361.45 |
| 14 |  | -118.74 | Negombata ceramide 1a /CP3832                                                                                | 654.1  |
| 15 |  | -118.71 | C27-polyacetylene /CP1955                                                                                    | 362.59 |
| 16 |  | -118.58 | 2,3-dihydro-7-hydroxy-5-methyl-3-((3Z,6Z,9Z,12Z,15Z)-octadeca-3,6,9,12,15-pentaenyl)chromen-4-one /CP2598    | 432.59 |
| 17 |  | -118.52 | Triacontanol/ CP2649                                                                                         | 438.81 |
| 18 |  | -117.87 | Spinescen /CP3792                                                                                            | 638.92 |
| 19 |  | -117.77 | Triacontane /CP2480                                                                                          | 422.81 |
| 20 |  | -117.69 | Tritriacontane /CP2920                                                                                       | 464.89 |
| 21 |  | -117.68 | 10-hydroxyiligstroside /CP3371                                                                               | 540.51 |
| 22 |  | -117.31 | (S,5Z,8Z,11Z,13E,17Z)-15-hydroxy-1-(2,4,6-trihydroxyphenyl)-15-methylcosa-5,8,11,13,17-pentaen-1-one/ CP2653 | 439.56 |



|    |  |          |                                                                                                                     |        |
|----|--|----------|---------------------------------------------------------------------------------------------------------------------|--------|
| 23 |  | -115.92  | Hexadecanyl octadecanoate/<br>CP3233                                                                                | 508.9  |
| 24 |  | -115.68  | Nervonic acid/ CP1991                                                                                               | 365.61 |
| 25 |  | -115.65  | Tanacetolide B/ CP2159                                                                                              | 383.61 |
| 26 |  | -115.63  | N1,N10-di-<br>dihydrocaffeoylspermidine/C<br>P2993                                                                  | 474.57 |
| 27 |  | -115.435 | Eicosyl docosanoate /CP3699                                                                                         | 621.12 |
| 28 |  | -115.38  | 5-hydroxydotriacontan-9-one/<br>CP3059                                                                              | 480.85 |
| 29 |  | -115.21  | 5-hydroxytriacontan-9-one/<br>CP2791                                                                                | 452.79 |
| 30 |  | -115.05  | 23-hydroxyhentriacontan-29-<br>one/ CP2928                                                                          | 466.82 |
| 31 |  | -114.99  | 2,3-dihydro-5,7-dihydroxy-3-<br>((3Z,6Z,9Z,12Z,15Z)-<br>octadeca-3,6,9,12,15-<br>pentaenyl)chromen-4-one<br>/CP2614 | 433.56 |
| 32 |  | -114.92  | Nonacosan-10-ol /CP2503                                                                                             | 424.79 |
| 33 |  | -114.71  | 1,2,6-tri-O-galloyl-beta-D-<br>glucose/ CP3773                                                                      | 633.44 |
| 34 |  | -114.37  | Squalene/ CP2381                                                                                                    | 410.72 |
| 35 |  | -114.33  | Karatavicinol/ CP2307                                                                                               | 400.51 |
| 36 |  | -114.24  | Dotriacontane/ CP2784                                                                                               | 450.87 |
| 37 |  | -114.04  | Cosanyl octadecanoate/<br>CP3455                                                                                    | 565.01 |

|    |                                                                                   |         |                                     |        |
|----|-----------------------------------------------------------------------------------|---------|-------------------------------------|--------|
| 38 | 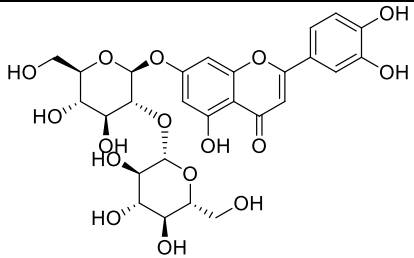 | -113.96 | Luteolin 7-O-sophoroside/<br>CP3666 | 609.51 |
| 39 |  | -113.94 | Pentatriacontane/ CP3153            | 492.95 |

## References:

18. Yang, S.; Huang, F.K.; Huang, J.; Chen, S.; Jakoncic, J.; Leo-Macias, A.; Diaz-Avalos, R.; Chen, L.; Zhang, J.J.; Huang, X.Y. Molecular Mechanism of Fascin Function in Filopodial Formation. *J. Biol. Chem.* **2013**, *288*, 274–284, doi:10.1074/JBC.M112.427971.
21. Chen, L.; Yang, S.; Jakoncic, J.; Zhang, J.J.; Huang, X.Y. Migrastatin Analogues Target Fascin to Block Tumour Metastasis. *Nat. 2010 4647291* **2010**, *464*, 1062–1066, doi:10.1038/nature08978.
24. Huang, J.; Dey, R.; Wang, Y.; Jakoncic, J.; Kurinov, I.; Huang, X.Y. Structural Insights into the Induced-Fit Inhibition of Fascin by a Small-Molecule Inhibitor. *J. Mol. Biol.* **2018**, *430*, 1324–1335, doi:10.1016/J.JMB.2018.03.009.
27. Francis, S.; Croft, D.; Schüttelkopf, A.W.; Parry, C.; Pugliese, A.; Cameron, K.; Claydon, S.; Drysdale, M.; Gardner, C.; Gohlke, A.; et al. Structure-Based Design, Synthesis and Biological Evaluation of a Novel Series of Isoquinolone and Pyrazolo[4,3-c]Pyridine Inhibitors of Fascin 1 as Potential Anti-Metastatic Agents. *Bioorg. Med. Chem. Lett.* **2019**, *29*, 1023, doi:10.1016/J.BMCL.2019.01.035.
80. Sedeh, R.S.; Fedorov, A.A.; Fedorov, E. V.; Ono, S.; Matsumura, F.; Almo, S.C.; Bathe, M. Structure, Evolutionary Conservation, and Conformational Dynamics of Homo Sapiens Fascin-1, an F-Actin Crosslinking Protein. *J. Mol. Biol.* **2010**, *400*, 589–604, doi:10.1016/J.JMB.2010.04.043.
81. Jansen, S.; Collins, A.; Yang, C.; Rebowski, G.; Svitkina, T.; Dominguez, R. Mechanism of Actin Filament Bundling by Fascin. *J. Biol. Chem.* **2011**, *286*, 30087–30096, doi:10.1074/JBC.M111.251439.
